# Supplementary material for: An Assessment of Urea-Formaldehyde Fertilizer on the Diversity of Bacterial Communities in Onion and Sugar Beet
Source: PubMed Central journal article supplement (PMC4103532; doi:10.1264/jsme2.me13157), 2014-05-30
Supplement: 29_231_s1.pdf [file 29_231_s1.pdf]

Supplementary materials

An assessment of Urea-Formaldehyde Fertilizer on the Diversity of Bacterial Communities

in Onion and Sugar beet

SEISHI IKEDA<sup>1\*</sup>, KEIJIRO SUZUKI<sup>2,3</sup>, MAKOTO KAWAHARA<sup>4</sup>,

MASAO NOSHIRO<sup>5</sup>, and NAOKAZU TAKAHASHI<sup>4</sup>

<sup>1</sup>*Hokkaido Agricultural Research Center, National Agriculture and Food Research Organization, 9-4 Shinsei-minami, Memuro-cho, Kasai-gun, Hokkaido 082-0081, Japan;* <sup>2</sup>*Kitami Agricultural Experiment Station, Aza Yayoi, Kunneppu, Hokkaido 090-1496, Japan;* <sup>3</sup>*Present address: Central Agricultural Experiment Station, Naganuma, Hokkaido 069-1395, Japan;* <sup>4</sup>*SUN AGRO Co., Ltd., 1470 Shiraoka, Shiraoka, Saitama 349-0218, Japan; and* <sup>5</sup>*HOKKAIDO SUN AGRO Co., Ltd., Sapporo-daiichiseimei-building, Kita 3, Nishi 4, Chuo-ku, Sapporo, Hokkaido 060-0003, Japan*

\*Corresponding author. E-mail: [sikeda67@affrc.go.jp](mailto:sikeda67@affrc.go.jp); Tel: +81-155-62-9276; Fax:

+81-155-61-2127.

Topic of the manuscript: ecology of plant-associated bacteria

Running title: Impacts of a UF fertilizer on plant bacteria

Supplementary Table 1. Accession numbers for clone libraries used in the present study

| Accession numbers | Libraries                   |
|-------------------|-----------------------------|
| AB810269-AB810355 | control library for site OA |
| AB810356-AB810445 | control library for site OB |
| AB810446-AB810519 | UF library for site OA      |
| AB810520-AB810595 | UF library for site OB      |
| AB810596-AB810679 | control library for site SA |
| AB810680-AB810759 | control library for site SB |
| AB810760-AB810848 | UF library for site SA      |
| AB810849-AB810937 | UF library for site SB      |

Supplementary Table 2. Yields data in the present study

| Crops      | Locations                 | Yields (t/ha)  |                 |
|------------|---------------------------|----------------|-----------------|
|            |                           | C <sup>a</sup> | UF <sup>a</sup> |
| Onion      | OA (Kitami city)          | 63.6           | 67.1            |
| Onion      | OB (Kunneppucho)          | 52.9           | 55.2            |
| Sugar beet | SA (Nakasatsunai village) | 57.9           | 61.4            |
| Sugar beet | SB (Obihiro city)         | 32.4           | 38.6            |

<sup>a</sup>C and UF indicate the conventional and UF fertilization, respectively.

**A**

| OTUs  | Libraries (%) |        |         |       | Closest known species                | Acc. No. | Identity (%) |
|-------|---------------|--------|---------|-------|--------------------------------------|----------|--------------|
|       | Site OA       |        | Site OB |       |                                      |          |              |
|       | C             | UF     | C       | UF    |                                      |          |              |
| OAP1  | 1.1           | 5.4    | -       | 1.3   | <i>Methylobacterium brachiatum</i>   | AB698745 | 100          |
| OAP2  | -             | 1.4    | -       | -     | <i>Methylobacterium hispanicum</i>   | HE800584 | 99           |
| OAP3  | -             | 0.0    | -       | 1.3   | <i>Methylobacterium adhaesivum</i>   | AB698724 | 99           |
| OAP4  | -             | 5.4*   | -       | 5.3*  | <i>Methylobacterium aquaticum</i>    | AB698676 | 99           |
| OAP5  | 1.1           | 1.4    | -       | 3.9   | <i>Methylobacterium populi</i>       | JX993406 | 100          |
| OAP6  | 1.1           | -      | -       | -     | <i>Bradyrhizobium elkanii</i>        | JQ911628 | 100          |
| OAP7  | -             | 1.4    | 1.1     | -     | <i>Bosea vestrisii</i>               | JX974340 | 99           |
| OAP8  | -             | -      | -       | 1.3   | <i>Rhizobium huautlense</i>          | AM237359 | 99           |
| OAP9  | -             | 1.4    | -       | -     | <i>Rhizobium etli</i>                | AM921623 | 99           |
| OAP10 | -             | 2.7    | -       | 2.6   | <i>Agrobacterium tumefaciens</i>     | AB680310 | 99           |
| OAP11 | -             | -      | 1.1     | -     | <i>Aurantimonas urelytica</i>        | AB682441 | 99           |
| OAP12 | -             | 1.4    | -       | -     | <i>Aurantimonas altamirensis</i>     | AB682666 | 100          |
| OAP13 | 75.9          | 40.5** | 3.3     | 3.9   | <i>Phyllobacterium myrsinacearum</i> | JX512224 | 100          |
| OAP14 | -             | -      | 1.1     | -     | <i>Sphingomonas mali</i>             | AB740933 | 98           |
| OAP15 | -             | 1.4    | -       | 1.3   | <i>Sphingomonas aquatilis</i>        | AB681116 | 99           |
| OAP16 | -             | 1.4    | -       | -     | <i>Sphingomonas trueperi</i>         | JQ579645 | 99           |
| OAP17 | 1.1           | 9.5*   | 1.1     | 14.5* | <i>Sphingomonas sanguinis</i>        | JQ660132 | 99           |
| OAP18 | 1.1           | -      | -       | -     | <i>Sphingomonas yunnanensis</i>      | HMD69130 | 98           |
| OAP19 | -             | -      | -       | 1.3   | <i>Sphingomonas humi</i>             | JX094162 | 98           |

**B**

| OTUs                       | Libraries (%) |       |         |      | Closest known species                    | Acc. No.  | Identity (%) |
|----------------------------|---------------|-------|---------|------|------------------------------------------|-----------|--------------|
|                            | Site SA       |       | Site SB |      |                                          |           |              |
|                            | C             | UF    | C       | UF   |                                          |           |              |
| <b>Gammaproteobacteria</b> |               |       |         |      |                                          |           |              |
| SGP1                       | -             | -     | 1.3     | 1.1  | <i>Aquicella siphonis</i>                | NR_025764 | 95           |
| SGP2                       | -             | 1.1   | -       | -    | <i>Aquicella siphonis</i>                | AY359284  | 93           |
| SGP3                       | -             | 1.1   | -       | 2.2  | <i>Aquicella siphonis</i>                | AY359284  | 92           |
| SGP4                       | -             | 1.1   | -       | -    | <i>Aquicella siphonis</i>                | AY359284  | 92           |
| SGP5                       | -             | 1.1   | -       | -    | <i>Aquicella siphonis</i>                | NR_025764 | 92           |
| SGP6                       | -             | -     | -       | 1.1  | <i>Aquicella siphonis</i>                | NR_025764 | 91           |
| SGP7                       | -             | -     | -       | 5.6* | <i>Aquicella siphonis</i>                | NR_025764 | 88           |
| SGP8                       | -             | -     | 1.3     | -    | <i>Legionella pneumophila</i>            | FR799704  | 88           |
| SGP9                       | -             | -     | 1.3     | -    | <i>Legionella drancourtii</i>            | NR_026335 | 87           |
| SGP10                      | -             | 1.1   | -       | 1.1  | <i>Ectothiorhodospira shaposhnikovii</i> | FR733667  | 87           |
| SGP11                      | -             | -     | -       | 1.1  | <i>Legionella oakridgensis</i>           | JX827100  | 86           |
| SGP12                      | 1.2           | 2.2   | -       | -    | <i>Legionella oakridgensis</i>           | JX827100  | 86           |
| SGP13                      | -             | -     | 1.3     | 2.2  | <i>Legionella greslensis</i>             | NR_028744 | 86           |
| SGP14                      | -             | -     | 1.3     | -    | <i>Legionella nautarum</i>               | NR_044961 | 86           |
| SGP15                      | -             | 1.1   | -       | -    | <i>Coxiella burnetii</i>                 | D89792    | 83           |
| SGP16                      | -             | -     | 1.3     | -    | <i>Methylobacter whittenburyi</i>        | NR_029242 | 89           |
| SGP17                      | -             | -     | -       | 2.2  | <i>Ectothiorhodospira mongolicus</i>     | NR_042831 | 89           |
| SGP18                      | -             | 1.1   | -       | -    | <i>Legionella brunensis</i>              | NR_026520 | 87           |
| SGP19                      | -             | -     | 1.3     | -    | <i>Legionella rowbothamii</i>            | NR_036804 | 85           |
| SGP20                      | -             | 1.1   | -       | -    | <i>Lysobacter daejeonensis</i>           | AB682404  | 85           |
| SGP21                      | -             | -     | -       | 1.1  | <i>Coxiella burnetii</i>                 | CP000890  | 86           |
| SGP22                      | 1.2           | 1.1   | -       | -    | <i>Coxiella burnetii</i>                 | CP000890  | 87           |
| SGP23                      | 2.4           | -     | -       | -    | <i>Rickettsiella tipulae</i>             | EU180598  | 85           |
| SGP24                      | -             | 1.1   | -       | -    | <i>Rickettsiella tipulae</i>             | EU180598  | 84           |
| SGP25                      | -             | -     | -       | 1.1  | <i>Rickettsiella grylli</i>              | U97547    | 89           |
| SGP26                      | 2.4           | -     | -       | 1.1  | <i>Coxiella burnetii</i>                 | CP000890  | 90           |
| SGP27                      | 2.4           | -     | -       | -    | <i>Coxiella burnetii</i>                 | CP000890  | 89           |
| SGP28                      | -             | 1.1   | -       | -    | <i>Coxiella burnetii</i>                 | CP000890  | 89           |
| SGP29                      | 2.4           | 2.2   | -       | -    | <i>Cedecea davisae</i>                   | AB682275  | 99           |
| SGP30                      | -             | 3.4   | -       | -    | <i>Pectobacterium carotovorum</i>        | JX196705  | 100          |
| SGP31                      | 1.2           | 2.2   | -       | -    | <i>Ervinia persicina</i>                 | EF693791  | 99           |
| SGP32                      | 2.4           | 1.1   | -       | -    | <i>Pantoea agglomerans</i>               | HE647624  | 99           |
| SGP33                      | -             | -     | -       | 1.1  | <i>Serratia grimesii</i>                 | JQ008935  | 99           |
| SGP34                      | -             | -     | -       | 1.1  | <i>Klebsiella oxytoca</i>                | HQ683968  | 91           |
| SGP35                      | 22.6          | 4.5** | -       | 1.1  | <i>Pseudomonas salomonii</i>             | JXB40381  | 100          |
| <b>Bradyrhizobiaceae</b>   |               |       |         |      |                                          |           |              |
| SAP1                       | -             | -     | 1.3     | -    | <i>Rhodopseudomonas rhenobacensis</i>    | FN796846  | 94           |
| SAP2                       | 7.1           | 6.7   | 10.0    | 4.5  | <i>Rhodopseudomonas rhenobacensis</i>    | FN796846  | 98           |
| SAP3                       | 2.4           | 2.2   | 2.5     | 2.2  | <i>Bradyrhizobium elkanii</i>            | JQ911631  | 99           |
| SAP4                       | -             | 1.1   | -       | -    | <i>Rhodopseudomonas rhenobacensis</i>    | FN796846  | 95           |

**Supplementary Figure 1.** The phylogenetic distribution of OTUs based on 16S rRNA gene sequences of the clone libraries for onion- and sugar beet-associated bacteria. The dendrogram indicates the phylogenetic relationships among the representative sequences of OTUs (defined by  $\geq 97\%$  identity). The table indicates the relative abundance of clones or isolates belonging to each OTU in each library and the results of a BLAST search using representative sequences. Panel A, Alphaproteobacteria among the onion-associated bacteria; panel B, Alpha- and Gammaproteobacteria among the sugar beet-associated bacteria. \* and \*\* indicate statistical significance calculated using the Fisher's exact test at the 1 and 5% levels ( $P < 0.01$  and  $P < 0.05$ ), respectively, between conventional and UF fertilization conditions (C and UF, respectively).
